# Supplementary material
Source: publisher site journal article supplement (https://www.dovepress.com/get_supplementary_file.php?f=475929.docx)
Supplement: Supplementary file 1 [file get_supplementary_file.php]

**Supplementary Appendix**

**Proof of Proposition 1:** We employ backward induction to analyze the game. In the stage that the low-level diagnostic firm decides the price of diagnostic tests, by maximizing the profit, the low-level diagnostic firm decides the price as . By substituting the optimal price of diagnostic tests to the drug manufacturer's profit, the drug manufacturer decides the price of specialized drugs as . Therefore, and *.* To guarantee the positive prices and demand for the personalized medicine, i.e., , and , we have .

**Proof of Proposition 2:** Similarly, by maximizing the profit, the high-level diagnostic firm decides the optimal price of diagnostic tests as . By substituting the price of diagnostic tests into the drug manufacturer’s profit, the drug manufacturer decides the optimal price of specialized drugs as . Therefore, and *.* To guarantee the positive prices and demand for the personalized medicine, i.e., , and , we have and .

**Proof of Theorem 1:** By combining the prerequisites in Case NL ()and Case NH ( and ) ), we have and . Under these conditions, we can verify that and always holds.

**Proof of Theorem 2:** Under the conditions and , we can verify that *, ,* andalways holds.

**Proof of Proposition 3:** In this case, the government decides the price of personalized medicine in line with social welfare. We denote as the price of personalized medicine which consists of the price of specialized drugs and the price of diagnostic tests. By maximizing social welfare, the government decides the price of personalized medicine as . Based on the proportion of the price of specialized drugs in regulated pricing, we denote that and . Therefore, and *.* To guarantee the positive prices and demand for the personalized medicine, i.e., , and , we have and .

**Proof of Proposition 4:** Similarly, the government decides the price of personalized medicine as . Therefore,  *and .* To guarantee the positive prices and demand for the personalized medicine, i.e., , and , we have and .

**Proof of Theorem 3:** By combining the prerequisites in Case RL ( and ) and Case RH ( and ), we have and . Under these conditions, we can verify that if , where ; if , where .

**Proof of Theorem 4:** Under the conditions and , we can verify that if and, where , ,

,

,

,

,

,

;

if ; if , where ,

,

,

,

.

**Proof of Theorem 5:** By combining the prerequisites in the case without the government's regulated pricing ( and ) and case with the government's regulated pricing ( and ), we have , , and . Our analysis below will be conducted under these conditions.

Since the government makes the regulated pricing decisions first, the government is in a leadership role in the sequence of the game. Hence, the government needs to estimate the drug manufacturer's diagnostic test choices to make its regulated pricing decisions. We employ backward induction to solve this game. For simplicity, we only analyze the conditions that the government decides to regulate pricing, the conditions that the government decides not to regulate pricing are the complementary set of the above conditions.

We denote the case where the drug manufacturer chooses to partner with the high-level diagnostic firm if the government decides not to regulate the prices, and the drug manufacturer chooses to partner with the high-level diagnostic firm if the government decides to regulate the prices as case I. We denote the case where the drug manufacturer chooses to partner with the low-level diagnostic firm if the government decides not to regulate the prices, and the drug manufacturer chooses to partner with the high-level diagnostic firm if the government decides to regulate the prices as case II. We denote the case where the drug manufacturer chooses to partner with the high-level diagnostic firm if the government decides not to regulate the prices, and the drug manufacturer chooses to partner with the low-level diagnostic firm if the government decides to regulate the prices as case III. We denote the case where the drug manufacturer chooses to partner with the low-level diagnostic firm if the government decides not to regulate the prices, and the drug manufacturer chooses to partner with the low-level diagnostic firm if the government decides to regulate the prices as case IV.

The probability of case I occurring is . The government’s probability of adopting regulated pricing given the occurrence of the estimated case I is .

The probability of case II occurring is . The government’s probability of adopting regulated pricing given the occurrence of the estimated case II is . By calculation, we can derive that .

The probability of case III occurring is . The government’s probability of adopting regulated pricing given the occurrence of the estimated case III is .

The probability of case IV occurring is . The government’s probability of adopting regulated pricing given the occurrence of the estimated case IV is . By calculation, we can derive that .

Therefore, the government’s probability of adopting regulated pricing is . By calculation, we derive the condition for the above inequality to hold as *,* and, where , , ,

,

,

,

,

,

,

,

.
